# Supplementary material for: Accuracy and Reliability of the Kinect Version 2 for Clinical Measurement of Motor Function
Source: PubMed Central journal article supplement (PMC5115766; doi:10.1371/journal.pone.0166532), 2016-11-18
Supplement: pone.0166532.s002.pdf [file pone.0166532.s002.pdf]

This document includes the detailed processing steps to map the Vicon marker positions of a standard gait model to similar Kinect V2 landmark locations. First, the following processing steps were performed:

1. The units of the Vicon coordination system are converted from mm to m.
2. Y and Z dimension of the Vicon system were exchanged to match the orientation of the Kinect system. The resulting orientation of the coordinate system is X describes the left-right direction, Y the up-down direction and Z the direction towards the point of origin (i.e. the Kinect sensor).
3. The orientation of the X direction is inverted to represent the direction of the Kinect coordinate system.

The following describes the mapping of the Vicon markers to the nearest Kinect landmarks.

Table 1: Mapping of Vicon marker to anatomical landmark from Kinect. If more than one marker name is given, the mean of these markers are used.

| Kinect landmark | Vicon marker              |
|-----------------|---------------------------|
| FootL           | LTOE and LTOE5            |
| FootR           | RTOE and RTOE5            |
| AnkleL          | LANK                      |
| AnkleR          | RANK                      |
| KneeL           | LKNE                      |
| KneeR           | RKNE                      |
| HipL            | LASI                      |
| HipR            | RASI                      |
| Spine base      | RASI,LASI,LPSI and RPSI   |
| Spine mid       | CLAV and Spine base       |
| Spine shoulder  | C7                        |
| Head            | RFHD, LFHD, RBHD and LBHD |
| ShoulderL       | LSHO                      |
| ShoulderR       | RSHO                      |
| ElbowL          | LELB                      |
| ElbowR          | RELB                      |
| WristL          | LWRA and LWRB             |
| WristR          | RWRA and RWRB             |
| HandL           | LFIN                      |
| HandR           | RFIN                      |
