# Supplementary material for: Accuracy and Reliability of the Kinect Version 2 for Clinical Measurement of Motor Function
Source: PubMed Central journal article supplement (PMC5115766; doi:10.1371/journal.pone.0166532), 2016-11-18
Supplement: pone.0166532.s007.pdf [file pone.0166532.s007.pdf]

This document includes the detected outliers, that are excluded from parameter extraction and analyses.

| JointName     | Repetition | SubjectId | AssessmentId | Dimension | SNR    | Max. Speed | Amplitude Difference |
|---------------|------------|-----------|--------------|-----------|--------|------------|----------------------|
| ankleR        | 4          | 11        | SAS          | Y         | -12.88 | 0.08       | 0.12                 |
| spineShoulder | 1          | 8         | SLW          | Y         | -15.16 | 0.06       | 0.10                 |
| spineShoulder | 2          | 8         | SLW          | Y         | -13.59 | 0.06       | 0.10                 |
| ankleR        | 3          | 9         | POCO         | Y         | -29.51 | 0.10       | 0.11                 |
| ankleL        | 4          | 11        | POCO         | Y         | -46.42 | 1.21       | 1.24                 |
| ankleR        | 4          | 11        | POCO         | Y         | -54.18 | 1.29       | 1.29                 |
| spineShoulder | 4          | 11        | POCO         | Y         | -15.05 | 0.14       | 0.14                 |
| ankleL        | 1          | 14        | POCO         | Y         | -35.09 | 0.13       | 0.23                 |
| ankleL        | 2          | 14        | POCO         | Y         | -36.71 | 0.16       | 0.24                 |
| ankleL        | 3          | 14        | POCO         | Y         | -15.41 | 0.13       | 0.14                 |
| ankleL        | 4          | 14        | POCO         | Y         | -37.23 | 0.14       | 0.21                 |
| ankleL        | 5          | 14        | POCO         | Y         | -28.45 | 0.14       | 0.18                 |
| ankleL        | 5          | 15        | POCO         | Y         | -23.64 | 0.08       | 0.10                 |
| ankleR        | 5          | 19        | POCO         | Y         | -33.69 | 0.09       | 0.17                 |
| ankleL        | 4          | 11        | POCO         | X         | -50.05 | 2.09       | 2.10                 |
| ankleR        | 4          | 11        | POCO         | X         | -53.45 | 2.02       | 2.02                 |
| spineShoulder | 4          | 11        | POCO         | X         | -28.98 | 2.04       | 2.04                 |
| ankleL        | 4          | 11        | POCO         | Z         | -58.39 | 3.31       | 3.32                 |
| ankleR        | 4          | 11        | POCO         | Z         | -61.38 | 3.30       | 3.31                 |
| spineShoulder | 4          | 11        | POCO         | Z         | -29.87 | 2.08       | 2.07                 |
| ankleL        | 1          | 14        | POCO         | Z         | -26.81 | 0.06       | 0.12                 |
| ankleL        | 4          | 14        | POCO         | Z         | -26.08 | 0.06       | 0.11                 |

Table 1: Overview of excluded Outliers based on Kinect Data

| JointName     | Repetition | SubjectId | AssessmentId | Dimension | SNR   | Max. Speed | Amplitude Difference |
|---------------|------------|-----------|--------------|-----------|-------|------------|----------------------|
| spineShoulder | 1          | 1         | SAS          | Y         | 17.54 | 0.065      | -0.047               |

Table 2: Overview of excluded Outliers based on Vicon Data
